RESEARCH ARTICLE

# Model and Comparative Study for Flow of Viscoelastic Nanofluids with Cattaneo-Christov Double Diffusion

Tasawar Hayat<sup>1,2</sup>, Arsalan Aziz<sup>1</sup>, Taseer Muhammad<sup>1\*</sup>, Ahmed Alsaedi<sup>2</sup>

**1** Department of Mathematics, Quaid-I-Azam University, Islamabad, Pakistan, **2** Nonlinear Analysis and Applied Mathematics (NAAM) Research Group, Department of Mathematics, Faculty of Science, King Abdulaziz University, Jeddah, Saudi Arabia

\* [taseer@math.qau.edu.pk](mailto:taseer@math.qau.edu.pk)

## Abstract

Here two classes of viscoelastic fluids have been analyzed in the presence of Cattaneo-Christov double diffusion expressions of heat and mass transfer. A linearly stretched sheet has been used to create the flow. Thermal and concentration diffusions are characterized firstly by introducing Cattaneo-Christov fluxes. Novel features regarding Brownian motion and thermophoresis are retained. The conversion of nonlinear partial differential system to nonlinear ordinary differential system has been taken into place by using suitable transformations. The resulting nonlinear systems have been solved via convergent approach. Graphs have been sketched in order to investigate how the velocity, temperature and concentration profiles are affected by distinct physical flow parameters. Numerical values of skin friction coefficient and heat and mass transfer rates at the wall are also computed and discussed. Our observations demonstrate that the temperature and concentration fields are decreasing functions of thermal and concentration relaxation parameters.

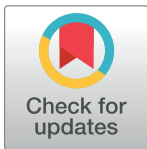

## OPEN ACCESS

**Citation:** Hayat T, Aziz A, Muhammad T, Alsaedi A (2017) Model and Comparative Study for Flow of Viscoelastic Nanofluids with Cattaneo-Christov Double Diffusion. PLoS ONE 12(1): e0168824. doi:10.1371/journal.pone.0168824

**Editor:** Zhong-Ke Gao, Tianjin University, CHINA

**Received:** September 22, 2016

**Accepted:** December 6, 2016

**Published:** January 3, 2017

**Copyright:** © 2017 Hayat et al. This is an open access article distributed under the terms of the [Creative Commons Attribution License](https://creativecommons.org/licenses/by/4.0/), which permits unrestricted use, distribution, and reproduction in any medium, provided the original author and source are credited.

**Data Availability Statement:** All relevant data are within the paper.

**Funding:** The authors received no specific funding for this work.

**Competing Interests:** The authors have declared that no competing interests exist.

## 1. Introduction

There is a significant advancement in the nanotechnology due to its rich applications in the industrial and physiological processes. The modern researchers are engaged to explore the mechanisms through the nanomaterials. A solid-liquid mixture of tiny size nanoparticles and base liquid is known as nanofluid. The colloids of base liquid and nanoparticles have important physical characteristics which enhance their potential role in the applications of ceramics, drug delivery, paintings, coatings etc. Nanofluids are declared as super coolants because their heat absorption capacity is much higher than traditional liquids. The reduction of the system and enhancement in its performance can be achieved with the implications of nanoliquids. The term nanofluid was first introduced by Choi and Eastman [1] and they illustrated that the thermal properties of base liquids are enhanced when we add up the nanoparticles in it. Buongiorno [2] developed the model of nanoparticles by considering the thermophoretic and Brownian motion aspects. Further the recent developments on nanoliquids can be seen in the investigations [3–20].

The process of heat transfer occurs when there is a difference of temperature between the bodies or between the various parts of the same body. This process has vast technological and industrial use, for example, cooling of atomic reactors, power generation, energy production etc. The famous law of heat conduction proposed by Fourier [21] is mostly employed for heat transfer attributes since it appeared in the literature. Cattaneo [22] modified this law by including a term of relaxation time. This term overcomes the paradox of heat conduction. Christov [23] further modified the Cattaneo theory [22] by substituting the time derivative with Oldroyd upper-convected derivative. This theory is termed as the Cattaneo-Christov heat flux theory. Straughan [24] employed heat flux model by Cattaneo-Christov theory to explore thermal convection in horizontal layer of viscous liquid. Ciarletta and Straughan [25] showed the structural stability and uniqueness of solutions for an energy equation with heat flux by Cattaneo-Christov expression. Haddad [26] discussed the thermal instability in the Brinkman porous medium by employing heat flux with Cattaneo-Christov expression. Han et al. [27] addressed the stretched flow of Maxwell liquid through heat flux by Cattaneo-Christov expression. Mustafa [28] used heat flux through Cattaneo-Christov expression in order to explore heat transfer for flow of Maxwell material. He provided numeric and analytic solutions of governing flow systems. Khan et al. [29] provided a numerical analysis to study the thermal relaxation attributes in Maxwell material flow by an exponentially stretched surface. Recently, Hayat et al. [30] performed a comparative study for flows of viscoelastic materials by considering heat flux through Cattaneo-Christov expression.

At present the non-Newtonian materials have gained much attention because of their involvement in extensive industrial and engineering applications. Such applications involve bio-engineering and polymeric liquids, plastics manufacturing, annealing and thinning of copper wires, food processing, petroleum production, drawing of stretching sheet through quiescent fluid and aerodynamic extrusion of plastic films etc. The well-known Navier-Stokes expression is not good enough to characterize the flows of non-Newtonian materials. A single relation is not sufficient to depict the characteristics of all the non-Newtonian materials. Therefore, different types of non-Newtonian relations are given in the literature. Amongst these relations, the elasto-viscous and second grade materials [31–36] are the simplest subclasses of differential type non-Newtonian materials which describe the effects of normal stress. Moreover the analysis of liquid-liquid two-phase flows are widely involved in several industrial processes such as spray processes, lubrication, natural gas networks, nuclear reactor cooling etc. Thus Gao et al. [37] provided a multivariate weighted complex network analysis to examine the nonlinear dynamic behavior in two-phase flow. Gao et al. [38] also addressed the multi-frequency complex network to explore the uncovering oil-water flow structure. Slug to churn flow transition by employing the multivariate pseudo Wigner distribution and multivariate multiscale entropy is reported by Gao et al. [39]. Gao et al. [40] provided a four-sector conductance method to explore the low-velocity oil-water two-phase flows. Recently Gao et al. [41] developed a novel multiscale limited penetrable horizontal visibility graph to analyze the nonlinear time series.

This research article presents a comparative study for Cattaneo-Christov double diffusion expressions in the boundary-layer flow of viscoelastic nanofluids by considering two classes of viscoelastic fluids. Constitutive relations for second grade and elasto-viscous fluids are considered. Brownian motion and thermophoresis aspects are considered. Most of the investigations in the literature are explained through the classical Fourier's and Fick's laws. The main purpose here is to utilize the generalized Fourier's and Fick's laws namely Cattaneo-Christov double diffusion expressions in the boundary-layer flow of viscoelastic nanofluids. Mathematical formulation of the present analysis is performed subject to both generalized Fourier's and Fick's laws namely Cattaneo-Christov double diffusion expressions. In particular the present study generalizes the results of ref. [35] by considering another model of elasto-viscous fluid, comparison

and double diffusion of heat and mass transfer by Cattaneo-Christov theory. Thus to the best of the author’s knowledge, no such attempt has been discussed in the literature yet. Transformation procedure is utilized to convert the partial differential system into the set of nonlinear ordinary differential system. The governing nonlinear system has been solved through the homotopy analysis method (HAM) [42–50]. Convergence of computed solutions is checked by plots and numerical data. The contributions of various pertinent parameters are studied and discussed. Heat and mass transfer rates at the surface are also analyzed through numerical values.

## 2. Formulation

Let us consider the steady two-dimensional (2D) flow of viscoelastic nanofluids over a linear stretching sheet with constant surface temperature and concentration. The flow models for elasto-viscous and second grade materials are considered. The Brownian motion and thermophoresis are taken into consideration. Here  $x$ -axis is along the stretching surface while  $y$ -axis is normal to the  $x$ -axis. The stretching velocity is  $u_w(x) = ax$  with  $a > 0$  as the constant. The heat and mass transfer mechanisms are examined through Cattaneo-Christov double diffusion expressions. Governing equations of mass, momentum, energy and nanoparticles concentration for boundary layer considerations are

$$\frac{\partial u}{\partial x} + \frac{\partial v}{\partial y} = 0, \tag{1}$$

$$u \frac{\partial u}{\partial x} + v \frac{\partial u}{\partial y} = \nu \frac{\partial^2 u}{\partial y^2} - k_0 \left( u \frac{\partial^3 u}{\partial x \partial y^2} + v \frac{\partial^3 u}{\partial y^3} - \frac{\partial u}{\partial y} \frac{\partial^2 u}{\partial x \partial y} + \frac{\partial u}{\partial x} \frac{\partial^2 u}{\partial y^2} \right). \tag{2}$$

Note that  $u$  and  $v$  represent the flow velocities in the horizontal and vertical directions respectively while  $\nu (= \mu / \rho_f)$ ,  $\mu$ ,  $\rho_f$  and  $k_0 = -\alpha_1 / \rho_f$  denote kinematic viscosity, dynamic viscosity, density of base liquid and elastic parameter respectively. Here ( $k_0 > 0$ ) depicts elasto-viscous fluid, ( $k_0 < 0$ ) demonstrates second grade fluid and ( $k_0 = 0$ ) corresponds to Newtonian fluid. The Cattaneo-Christov double diffusion theory has been introduced in characterizing thermal and concentration diffusions with heat and mass fluxes relaxations respectively. Then the frame indifferent generalization regarding Fourier’s law and Fick’s law (which is named as Cattaneo-Christov anomalous diffusion expressions) are derived as follows:

$$\mathbf{q} + \lambda_E \left( \frac{\partial \mathbf{q}}{\partial t} + \mathbf{V} \cdot \nabla \mathbf{q} - \mathbf{q} \cdot \nabla \mathbf{V} + (\nabla \cdot \mathbf{V}) \mathbf{q} \right) = -k \nabla T, \tag{3}$$

$$\mathbf{J} + \lambda_C \left( \frac{\partial \mathbf{J}}{\partial t} + \mathbf{V} \cdot \nabla \mathbf{J} - \mathbf{J} \cdot \nabla \mathbf{V} + (\nabla \cdot \mathbf{V}) \mathbf{J} \right) = -D_B \nabla C, \tag{4}$$

where  $\mathbf{q}$  and  $\mathbf{J}$  stand for heat and mass fluxes respectively,  $k$  for thermal conductivity,  $D_B$  for Brownian diffusivity,  $\lambda_E$  and  $\lambda_C$  for relaxation time of heat and mass fluxes respectively. Classical Fourier’s and Fick’s laws are deduced by inserting  $\lambda_E = \lambda_C = 0$  in Eqs (3) and (4). By considering the incompressibility condition ( $\nabla \cdot \mathbf{V} = 0$ ) and steady flow with ( $\frac{\partial \mathbf{q}}{\partial t} = 0$ ) and ( $\frac{\partial \mathbf{J}}{\partial t} = 0$ ), Eqs (3) and (4) can be rewritten as

$$\mathbf{q} + \lambda_E (\mathbf{V} \cdot \nabla \mathbf{q} - \mathbf{q} \cdot \nabla \mathbf{V}) = -k \nabla T, \tag{5}$$

$$\mathbf{J} + \lambda_C (\mathbf{V} \cdot \nabla \mathbf{J} - \mathbf{J} \cdot \nabla \mathbf{V}) = -D_B \nabla C. \tag{6}$$

Now by taking the Brownian motion and thermophoresis effects in Eqs (5) and (6), then the two dimensional energy and concentration equations take the following forms:

$$u \frac{\partial T}{\partial x} + v \frac{\partial T}{\partial y} + \lambda_E \Phi_E = \alpha \left( \frac{\partial^2 T}{\partial y^2} \right) + \frac{(\rho c)_p}{(\rho c)_f} \left( D_B \left( \frac{\partial T}{\partial y} \frac{\partial C}{\partial y} \right) + \frac{D_T}{T_\infty} \left( \frac{\partial T}{\partial y} \right)^2 \right), \tag{7}$$

$$u \frac{\partial C}{\partial x} + v \frac{\partial C}{\partial y} + \lambda_C \Phi_C = D_B \left( \frac{\partial^2 C}{\partial y^2} \right) + \frac{D_T}{T_\infty} \left( \frac{\partial^2 T}{\partial y^2} \right). \tag{8}$$

Here one has the following prescribed conditions:

$$u = ax, \quad v = 0, \quad T = T_w, \quad C = C_w \quad \text{at} \quad y = 0, \tag{9}$$

$$u \rightarrow 0, \quad T \rightarrow T_\infty, \quad C \rightarrow C_\infty \quad \text{as} \quad y \rightarrow \infty, \tag{10}$$

where

$$\Phi_E = u \frac{\partial u}{\partial x} \frac{\partial T}{\partial x} + v \frac{\partial v}{\partial y} \frac{\partial T}{\partial y} + u \frac{\partial v}{\partial x} \frac{\partial T}{\partial y} + v \frac{\partial u}{\partial y} \frac{\partial T}{\partial x} + 2uv \frac{\partial^2 T}{\partial x \partial y} + u^2 \frac{\partial^2 T}{\partial x^2} + v^2 \frac{\partial^2 T}{\partial y^2}, \tag{11}$$

and

$$\Phi_C = u \frac{\partial u}{\partial x} \frac{\partial C}{\partial x} + v \frac{\partial v}{\partial y} \frac{\partial C}{\partial y} + u \frac{\partial v}{\partial x} \frac{\partial C}{\partial y} + v \frac{\partial u}{\partial y} \frac{\partial C}{\partial x} + 2uv \frac{\partial^2 C}{\partial x \partial y} + u^2 \frac{\partial^2 C}{\partial x^2} + v^2 \frac{\partial^2 C}{\partial y^2}, \tag{12}$$

in which  $\alpha = k/(\rho c)_f$ ,  $(\rho c)_p$  and  $(\rho c)_f$  stand for thermal diffusivity, heat capacity of liquid and effective heat capacity of nanoparticles respectively,  $D_B$  for Brownian diffusivity,  $C$  for concentration,  $D_T$  for thermophoretic diffusion coefficient,  $T_w$  and  $C_w$  for constant surface temperature and concentration respectively and  $T_\infty$  and  $C_\infty$  represent the ambient fluid temperature and concentration respectively. Selecting

$$u = axf'(\zeta), \quad v = -(av)^{1/2} f(\zeta), \quad \zeta = \left( \frac{ay}{v} \right)^{1/2} y, \tag{13}$$

$$\theta(\zeta) = \frac{T - T_\infty}{T_w - T_\infty}, \quad \phi(\zeta) = \frac{C - C_\infty}{C_w - C_\infty},$$

Eq (1) is identically verified and Eqs (2) and (7)–(12) have been reduced to

$$f''' + ff'' - (f')^2 - k^*(2f'f''' - (f'')^2 - ff^{iv}) = 0, \tag{14}$$

$$\frac{1}{Pr} \theta'' + N_b \theta' \phi' + N_t (\theta')^2 + f \theta' - \delta_c (ff' \theta' + f^2 \theta'') = 0, \tag{15}$$

$$\frac{1}{Sc} \phi'' + \frac{N_t}{N_b} \frac{1}{Sc} \theta'' + f \phi' - \delta_c (ff' \phi' + f^2 \phi'') = 0, \tag{16}$$

$$f = 0, \quad f' = 1, \quad \theta = 1, \quad \phi = 1 \quad \text{at} \quad \zeta = 0, \tag{17}$$

$$f' \rightarrow 0, \quad \theta \rightarrow 0, \quad \phi \rightarrow 0 \quad \text{as} \quad \zeta \rightarrow \infty, \tag{18}$$

where  $(k^*)$  stands for viscoelastic parameter,  $(Pr)$  for Prandtl number,  $(N_b)$  for Brownian motion parameter,  $(N_t)$  for thermophoresis parameter,  $(\delta_c)$  for thermal relaxation parameter,  $(Sc)$  for Schmidt number and  $(\delta_c)$  for concentration relaxation parameter. It is examined that  $(k^* > 0)$  shows elasto-viscous material and  $(k^* < 0)$  represents second grade material. These

parameters can be specified by using the definitions given below:

$$\left. \begin{aligned} k^* &= -\frac{k_0 a}{\nu}, \quad \text{Pr} = \frac{\nu}{\alpha}, \quad \delta_e = a\lambda_E, \quad \delta_c = a\lambda_C, \\ N_b &= \frac{(\rho c)_p D_B (C_w - C_\infty)}{(\rho c)_f \nu}, \quad N_t = \frac{(\rho c)_p D_T (T_w - T_\infty)}{(\rho c)_f \nu T_\infty}, \quad \text{Sc} = \frac{\nu}{D_B}. \end{aligned} \right\} \quad (19)$$

Skin friction coefficient is given by

$$C_f = \frac{\tau_w|_{y=0}}{\rho_f u_w^2} = \frac{\left( \nu \frac{\partial u}{\partial y} - k_0 \left( u \frac{\partial^2 u}{\partial x \partial y} - 2 \frac{\partial u}{\partial y} \frac{\partial v}{\partial y} + \nu \frac{\partial^2 u}{\partial y^2} \right) \right)_{y=0}}{u_w^2}, \quad (20)$$

The dimensionless form of skin friction coefficient is stated below:

$$\text{Re}_x^{1/2} C_f = (1 - 3k^*) f''(0), \quad (21)$$

where local Reynolds number is denoted by  $\text{Re}_x = u_w x / \nu$ .

### 3. Solutions by HAM

The appropriate initial approximations and auxiliary linear operators are defined as follows:

$$f_0(\zeta) = 1 - e^{-\zeta}, \quad \theta_0(\zeta) = e^{-\zeta}, \quad \phi_0(\eta) = e^{-\zeta}, \quad (22)$$

$$\mathbf{L}_f = \frac{d^3 f}{d\zeta^3} - \frac{df}{d\zeta}, \quad \mathbf{L}_\theta = \frac{d^2 \theta}{d\zeta^2} - \theta, \quad \mathbf{L}_\phi = \frac{d^2 \phi}{d\zeta^2} - \phi. \quad (23)$$

The above linear operators have the characteristics

$$\mathbf{L}_f [B_1^* + B_2^* e^\zeta + B_3^* e^{-\zeta}] = 0, \quad \mathbf{L}_\theta [B_4^* e^\zeta + B_5^* e^{-\zeta}] = 0, \quad \mathbf{L}_\phi [B_6^* e^\zeta + B_7^* e^{-\zeta}] = 0, \quad (24)$$

where  $B_j^*$  ( $j = 1-7$ ) elucidate the arbitrary constants. Deformation problems at zeroth-order are

$$(1 - \beta) \mathbf{L}_f [\tilde{f}(\zeta, \beta) - f_0(\zeta)] = \beta \mathbf{h}_f \mathbf{N}_f [\tilde{f}(\zeta, \beta)], \quad (25)$$

$$(1 - \beta) \mathbf{L}_\theta [\tilde{\theta}(\zeta, \beta) - \theta_0(\zeta)] = \beta \mathbf{h}_\theta \mathbf{N}_\theta [\tilde{f}(\zeta, \beta), \tilde{\theta}(\zeta, \beta), \tilde{\phi}(\zeta, \beta)], \quad (26)$$

$$(1 - \beta) \mathbf{L}_\phi [\tilde{\phi}(\zeta, \beta) - \phi_0(\zeta)] = \beta \mathbf{h}_\phi \mathbf{N}_\phi [\tilde{f}(\zeta, \beta), \tilde{\theta}(\zeta, \beta), \tilde{\phi}(\zeta, \beta)], \quad (27)$$

$$\left. \begin{aligned} \tilde{f}(0, \beta) &= 0, \quad \tilde{f}'(0, \beta) = 1, \quad \tilde{f}'(\infty, \beta) = 0, \quad \tilde{\theta}(0, \beta) = 1, \\ \tilde{\theta}(\infty, \beta) &= 0, \quad \tilde{\phi}(0, \beta) = 1, \quad \tilde{\phi}(\infty, \beta) = 0, \end{aligned} \right\} \quad (28)$$

$$\mathbf{N}_f [\tilde{f}(\zeta; \beta)] = \frac{\partial^3 \tilde{f}}{\partial \zeta^3} + \tilde{f} \frac{\partial^2 \tilde{f}}{\partial \zeta^2} - \left( \frac{\partial \tilde{f}}{\partial \zeta} \right)^2 - k^* \left( 2 \frac{\partial \tilde{f}}{\partial \zeta} \frac{\partial^3 \tilde{f}}{\partial \zeta^3} - \left( \frac{\partial^2 \tilde{f}}{\partial \zeta^2} \right)^2 - \tilde{f} \frac{\partial^4 \tilde{f}}{\partial \zeta^4} \right), \quad (29)$$

$$\mathbf{N}_\theta [\tilde{f}(\zeta; \beta), \tilde{\theta}(\zeta, \beta), \tilde{\phi}(\zeta, \beta)] = \frac{1}{\text{Pr}} \frac{\partial^2 \tilde{\theta}}{\partial \zeta^2} + N_b \frac{\partial \tilde{\theta}}{\partial \zeta} \frac{\partial \tilde{\phi}}{\partial \zeta} + N_t \left( \frac{\partial \tilde{\theta}}{\partial \zeta} \right)^2 + \tilde{f} \frac{\partial \tilde{\theta}}{\partial \zeta} - \delta_e \left( \tilde{f} \frac{\partial \tilde{f}}{\partial \zeta} \frac{\partial \tilde{\theta}}{\partial \zeta} + \tilde{f}^2 \frac{\partial^2 \tilde{\theta}}{\partial \zeta^2} \right), \quad (30)$$

$$N_\phi[\tilde{f}(\zeta; \beta), \tilde{\theta}(\zeta, \beta), \tilde{\phi}(\zeta, \beta)] = \frac{1}{Sc} \frac{\partial^2 \tilde{\phi}}{\partial \zeta^2} + \frac{N_t}{N_b} \frac{1}{Sc} \frac{\partial^2 \tilde{\theta}}{\partial \zeta^2} + \tilde{f} \frac{\partial \tilde{\phi}}{\partial \zeta} - \delta_c \left( \tilde{f} \frac{\partial \tilde{f}}{\partial \zeta} \frac{\partial \tilde{\phi}}{\partial \zeta} + \tilde{f}^2 \frac{\partial^2 \tilde{\phi}}{\partial \zeta^2} \right). \quad (31)$$

Here  $\beta \in [0,1]$  stands for embedding parameter,  $\tilde{h}_f$ ,  $\tilde{h}_\theta$  and  $\tilde{h}_\phi$  for nonzero auxiliary parameters and  $N_f$ ,  $N_\theta$  and  $N_\phi$  for nonlinear operators. For  $\beta = 0$  and  $\beta = 1$  one obtains

$$\tilde{f}(\zeta; 0) = f_0(\zeta), \tilde{f}(\zeta; 1) = f(\zeta), \quad (32)$$

$$\tilde{\theta}(\zeta, 0) = \theta_0(\zeta), \tilde{\theta}(\zeta, 1) = \theta(\zeta), \quad (33)$$

$$\tilde{\phi}(\zeta, 0) = \phi_0(\zeta), \tilde{\phi}(\zeta, 1) = \phi(\zeta). \quad (34)$$

When  $\beta$  changes from 0 to 1 then  $\tilde{f}(\zeta; \beta)$ ,  $\tilde{\theta}(\zeta; \beta)$  and  $\tilde{\phi}(\zeta; \beta)$  display alteration from initial approximations  $f_0(\zeta)$ ,  $\theta_0(\zeta)$  and  $\phi_0(\zeta)$  to final ultimate solutions  $f(\zeta)$ ,  $\theta(\zeta)$  and  $\phi(\zeta)$ . The following expressions are obtained via Taylor's series expansion:

$$\tilde{f}(\zeta; \beta) = f_0(\zeta) + \sum_{\tilde{m}=1}^{\infty} f_{\tilde{m}}(\zeta) \beta^{\tilde{m}}, f_{\tilde{m}}(\zeta) = \frac{1}{\tilde{m}!} \left. \frac{\partial^{\tilde{m}} \tilde{f}(\zeta; \beta)}{\partial \beta^{\tilde{m}}} \right|_{\beta=0}, \quad (35)$$

$$\tilde{\theta}(\zeta, \beta) = \theta_0(\zeta) + \sum_{\tilde{m}=1}^{\infty} \theta_{\tilde{m}}(\zeta) \beta^{\tilde{m}}, \theta_{\tilde{m}}(\zeta) = \frac{1}{\tilde{m}!} \left. \frac{\partial^{\tilde{m}} \tilde{\theta}(\zeta, \beta)}{\partial \beta^{\tilde{m}}} \right|_{\beta=0}, \quad (36)$$

$$\tilde{\phi}(\zeta, \beta) = \phi_0(\zeta) + \sum_{\tilde{m}=1}^{\infty} \phi_{\tilde{m}}(\zeta) \beta^{\tilde{m}}, \phi_{\tilde{m}}(\zeta) = \frac{1}{\tilde{m}!} \left. \frac{\partial^{\tilde{m}} \tilde{\phi}(\zeta, \beta)}{\partial \beta^{\tilde{m}}} \right|_{\beta=0}. \quad (37)$$

The convergence of Eqs (35)–(37) is strongly based upon the appropriate choices of  $\tilde{h}_f$ ,  $\tilde{h}_\theta$  and  $\tilde{h}_\phi$ . Selecting suitable values of  $\tilde{h}_f$ ,  $\tilde{h}_\theta$  and  $\tilde{h}_\phi$  so that Eqs (35)–(37) converge at  $\beta = 1$  then

$$f(\zeta) = f_0(\zeta) + \sum_{\tilde{m}=1}^{\infty} f_{\tilde{m}}(\zeta), \quad (38)$$

$$\theta(\zeta) = \theta_0(\zeta) + \sum_{\tilde{m}=1}^{\infty} \theta_{\tilde{m}}(\zeta), \quad (39)$$

$$\phi(\zeta) = \phi_0(\zeta) + \sum_{\tilde{m}=1}^{\infty} \phi_{\tilde{m}}(\zeta). \quad (40)$$

The  $\tilde{m}$ th-order deformation problems are defined as follows:

$$\mathbf{L}_f[f_{\tilde{m}}(\zeta) - \chi_{\tilde{m}}f_{\tilde{m}-1}(\zeta)] = \hat{\mathbf{h}}_f \hat{\mathbf{R}}_f^{\tilde{m}}(\zeta), \tag{41}$$

$$\mathbf{L}_\theta[\theta_{\tilde{m}}(\zeta) - \chi_{\tilde{m}}\theta_{\tilde{m}-1}(\zeta)] = \hat{\mathbf{h}}_\theta \hat{\mathbf{R}}_\theta^{\tilde{m}}(\zeta), \tag{42}$$

$$\mathbf{L}_\phi[\phi_{\tilde{m}}(\zeta) - \chi_{\tilde{m}}\phi_{\tilde{m}-1}(\zeta)] = \hat{\mathbf{h}}_\phi \hat{\mathbf{R}}_\phi^{\tilde{m}}(\zeta), \tag{43}$$

$$f_{\tilde{m}}(0) = f'_{\tilde{m}}(0) = f'_{\tilde{m}}(\infty) = 0, \theta_{\tilde{m}}(0) = \theta_{\tilde{m}}(\infty) = 0, \phi_{\tilde{m}}(0) = \phi_{\tilde{m}}(\infty) = 0, \tag{44}$$

$$\begin{aligned} \hat{\mathbf{R}}_f^{\tilde{m}}(\zeta) = & f_{\tilde{m}-1}''' + \sum_{k=0}^{\tilde{m}-1} f_{\tilde{m}-1-k} f_k'' - \sum_{k=0}^{\tilde{m}-1} f'_{\tilde{m}-1-k} f_k' - 2k^* \sum_{k=0}^{\tilde{m}-1} f'_{\tilde{m}-1-k} f_k''' \\ & + k^* \sum_{k=0}^{\tilde{m}-1} f''_{\tilde{m}-1-k} f_k'' + k^* \sum_{k=0}^{\tilde{m}-1} f_{\tilde{m}-1-k} f_k^{iv}, \end{aligned} \tag{45}$$

$$\begin{aligned} \hat{\mathbf{R}}_\theta^{\tilde{m}}(\zeta) = & \frac{1}{Pr} \theta_{\tilde{m}-1}'' + N_b \sum_{k=0}^{\tilde{m}-1} \theta'_{\tilde{m}-1-k} \phi_k' + N_t \sum_{k=0}^{\tilde{m}-1} \theta'_{\tilde{m}-1-k} \theta_k' + \sum_{k=0}^{\tilde{m}-1} f_{\tilde{m}-1-k} \theta_k' \\ & - \delta_e \sum_{k=0}^{\tilde{m}-1} f_{\tilde{m}-1-k} \sum_{l=0}^k f_{k-l}' \theta_l' - \delta_e \sum_{k=0}^{\tilde{m}-1} f_{\tilde{m}-1-k} \sum_{l=0}^k f_{k-l} \theta_l'', \end{aligned} \tag{46}$$

$$\begin{aligned} \hat{\mathbf{R}}_\phi^{\tilde{m}}(\zeta) = & \frac{1}{Sc} \phi_{\tilde{m}-1}'' + \frac{N_t}{N_b} \frac{1}{Sc} \theta_{\tilde{m}-1}'' + \sum_{k=0}^{\tilde{m}-1} f_{\tilde{m}-1-k} \phi_k' \\ & - \delta_c \sum_{k=0}^{\tilde{m}-1} f_{\tilde{m}-1-k} \sum_{l=0}^k f_{k-l}' \phi_l' - \delta_c \sum_{k=0}^{\tilde{m}-1} f_{\tilde{m}-1-k} \sum_{l=0}^k f_{k-l} \phi_l'', \end{aligned} \tag{47}$$

$$\chi_{\tilde{m}} = \begin{cases} 0, & \tilde{m} \leq 1, \\ 1, & \tilde{m} > 1. \end{cases} \tag{48}$$

General expressions ( $f_{\tilde{m}}, \theta_{\tilde{m}}, \phi_{\tilde{m}}$ ) for Eqs (41)–(43) in terms of special solutions ( $f_{\tilde{m}}^*, \theta_{\tilde{m}}^*, \phi_{\tilde{m}}^*$ ) are presented by the following expressions:

$$f_{\tilde{m}}(\zeta) = f_{\tilde{m}}^*(\zeta) + B_1^* + B_2^* e^\zeta + B_3^* e^{-\zeta}, \tag{49}$$

$$\theta_{\tilde{m}}(\zeta) = \theta_{\tilde{m}}^*(\zeta) + B_4^* e^\zeta + B_5^* e^{-\zeta}, \tag{50}$$

$$\phi_{\tilde{m}}(\zeta) = \phi_{\tilde{m}}^*(\zeta) + B_6^* e^\zeta + B_7^* e^{-\zeta}, \tag{51}$$

in which the constants  $B_j^*$  ( $j = 1-7$ ) through the boundary conditions (44) are given by

$$B_2^* = B_4^* = B_6^* = 0, B_3^* = \left. \frac{\partial f_{\tilde{m}}^*(\zeta)}{\partial \zeta} \right|_{\zeta=0}, \tag{52}$$

$$B_1^* = -B_3^* - f_{\tilde{m}}^*(0), B_5^* = -\theta_{\tilde{m}}^*(0), B_7^* = -\phi_{\tilde{m}}^*(0). \tag{53}$$

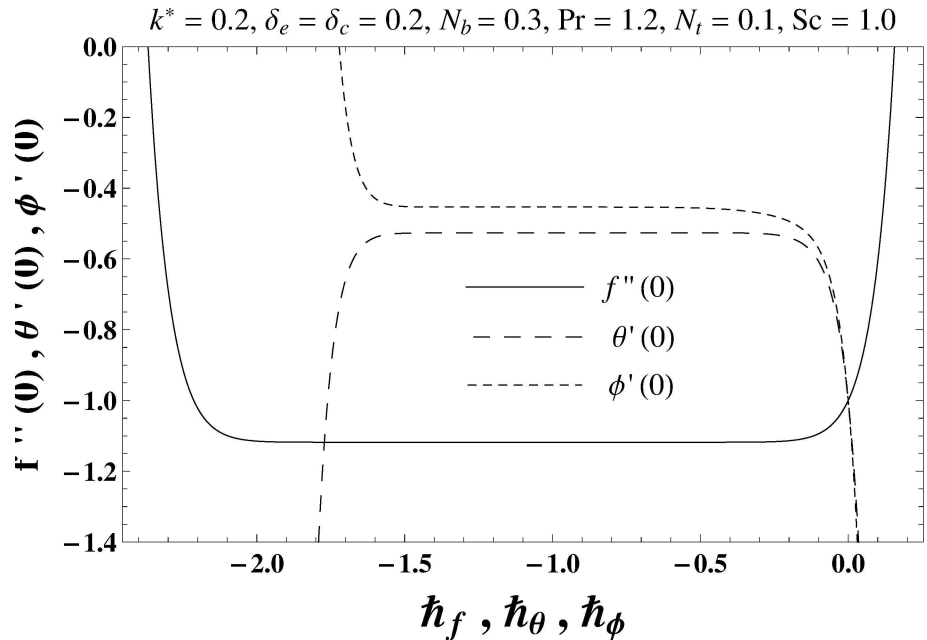

Fig 1. The  $h$ -curves for  $f$ ,  $\theta$  and  $\phi$  in case of elasto-viscous fluid.

doi:10.1371/journal.pone.0168824.g001

#### 4. Convergence Analysis

Here the expressions (38)–(40) contain  $h_f$ ,  $h_\theta$  and  $h_\phi$ . Moreover the convergence is accelerated by the auxiliary parameters  $h_f$ ,  $h_\theta$  and  $h_\phi$  in series solutions. For the purpose of determining appropriate values of  $h_f$ ,  $h_\theta$  and  $h_\phi$ , the  $h$ -curves at 20th order of deformations are sketched to see the appropriate ranges of  $h_f$ ,  $h_\theta$  and  $h_\phi$ . It is apparent from Figs 1 and 2 that the admissible

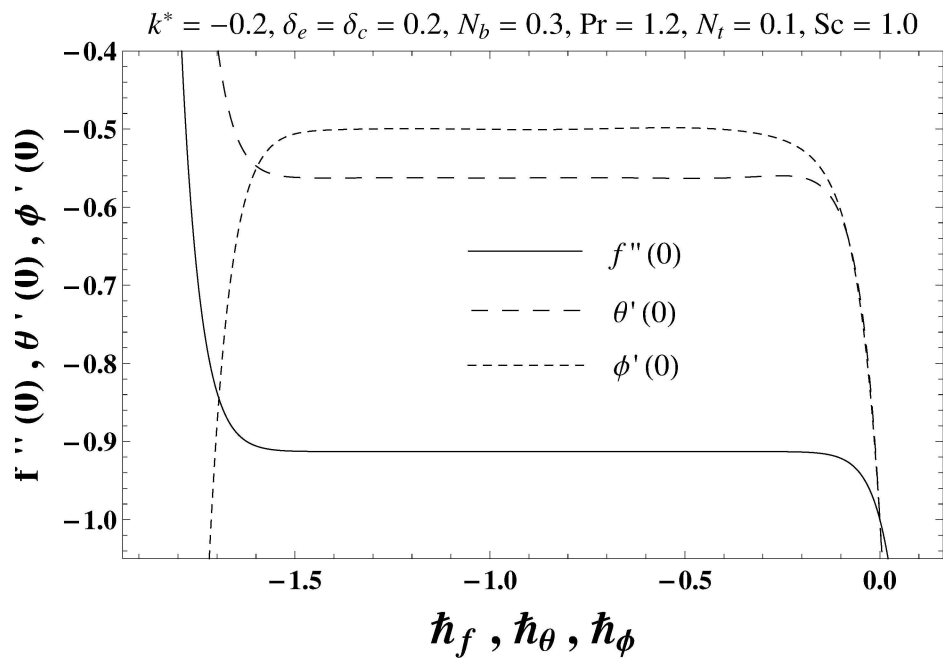

Fig 2. The  $h$ -curves for  $f$ ,  $\theta$  and  $\phi$  in case of second grade fluid.

doi:10.1371/journal.pone.0168824.g002



**Table 1. Homotopic solutions convergence in case of elastico-viscous material for different order of deformations when  $k^* = 0.2$ ,  $\delta_e = \delta_c = 0.2$ ,  $N_b = 0.3$ ,  $Pr = 1.2$ ,  $N_t = 0.1$  and  $Sc = 1.0$ .**

| Order of deformations | $-f''(0)$ | $-\theta'(0)$ | $-\phi'(0)$ |
|-----------------------|-----------|---------------|-------------|
| 1                     | 1.10000   | 0.54000       | 0.50000     |
| 5                     | 1.11802   | 0.52561       | 0.46919     |
| 12                    | 1.11803   | 0.52643       | 0.45373     |
| 19                    | 1.11803   | 0.52645       | 0.45333     |
| 25                    | 1.11803   | 0.52645       | 0.45333     |
| 35                    | 1.11803   | 0.52645       | 0.45333     |
| 50                    | 1.11803   | 0.52645       | 0.45333     |

doi:10.1371/journal.pone.0168824.t001

ranges of  $\tilde{h}_f$ ,  $\tilde{h}_\theta$  and  $\tilde{h}_\phi$  are  $-1.35 \leq \tilde{h}_f \leq -0.15$ ,  $-1.50 \leq \tilde{h}_\theta \leq -0.15$  and  $-1.60 \leq \tilde{h}_\phi \leq -0.15$  for elastico-viscous fluid ( $k^* > 0$ ) and  $-1.35 \leq \tilde{h}_f \leq -0.15$ ,  $-1.50 \leq \tilde{h}_\theta \leq -0.15$  and  $-1.60 \leq \tilde{h}_\phi \leq -0.15$  for second grade fluid ( $k^* < 0$ ). Table 1 shows that the convergent series solutions of velocity, temperature and concentration fields require the 19th order of approximations for elastico-viscous fluid situation whereas the 29th order of deformations are enough for the convergent homotopy solutions of second grade material situation (see Table 2).

### 5. Discussion

This portion elaborates the impacts of different interesting parameters like viscoelastic parameter ( $k^*$ ), thermal relaxation parameter ( $\delta_e$ ), concentration relaxation parameter ( $\delta_c$ ), Brownian motion parameter ( $N_b$ ), Prandtl number ( $Pr$ ), thermophoresis parameter ( $N_t$ ) and Schmidt number ( $Sc$ ) on the dimensionless velocity  $f(\zeta)$ , temperature  $\theta(\zeta)$  and concentration  $\phi(\zeta)$ . The results are achieved for elastico-viscous ( $k^* > 0$ ) and second grade ( $k^* < 0$ ) fluids respectively. Fig 3 illustrates that how viscoelastic parameter ( $k^*$ ) effects the velocity profile  $f(\zeta)$  for both fluids. From this Fig it has been analyzed that velocity field  $f(\zeta)$  decreases for the greater values of elastico-viscous parameter ( $k^* > 0$ ) and increases for the greater values of second grade parameter ( $k^* < 0$ ). For ( $k^* = 0$ ), the viscous fluid flow case is recovered. The influence of viscoelastic parameter ( $k^*$ ) on temperature distribution for both fluids has been shown in Fig 4. Here the temperature  $\theta(\zeta)$  and thickness of thermal layer are increased for positive values of viscoelastic parameter ( $k^*$ ) while opposite behavior is analyzed for negative values of viscoelastic parameter ( $k^*$ ). Fig 5 presents the variation in the temperature distribution for different values of thermal relaxation parameter ( $\delta_e$ ) for both fluids. From this Fig we can say that an increment in the values of thermal relaxation parameter ( $\delta_e$ ) show decreasing behavior in temperature field  $\theta(\zeta)$  and thermal layer thickness. Moreover the temperature field  $\theta(\zeta)$  is weaker for second grade

**Table 2. Homotopic solutions convergence in case of second grade material for different order of deformations when  $k^* = -0.2$ ,  $\delta_e = \delta_c = 0.2$ ,  $N_b = 0.3$ ,  $Pr = 1.2$ ,  $N_t = 0.1$  and  $Sc = 1.0$ .**

| Order of deformations | $-f''(0)$ | $-\theta'(0)$ | $-\phi'(0)$ |
|-----------------------|-----------|---------------|-------------|
| 1                     | 0.90000   | 0.54000       | 0.50000     |
| 5                     | 0.91286   | 0.55962       | 0.50144     |
| 12                    | 0.91287   | 0.56209       | 0.50043     |
| 20                    | 0.91287   | 0.56252       | 0.49987     |
| 29                    | 0.91287   | 0.56248       | 0.50005     |
| 35                    | 0.91287   | 0.56248       | 0.50005     |
| 50                    | 0.91287   | 0.56248       | 0.50005     |

doi:10.1371/journal.pone.0168824.t002

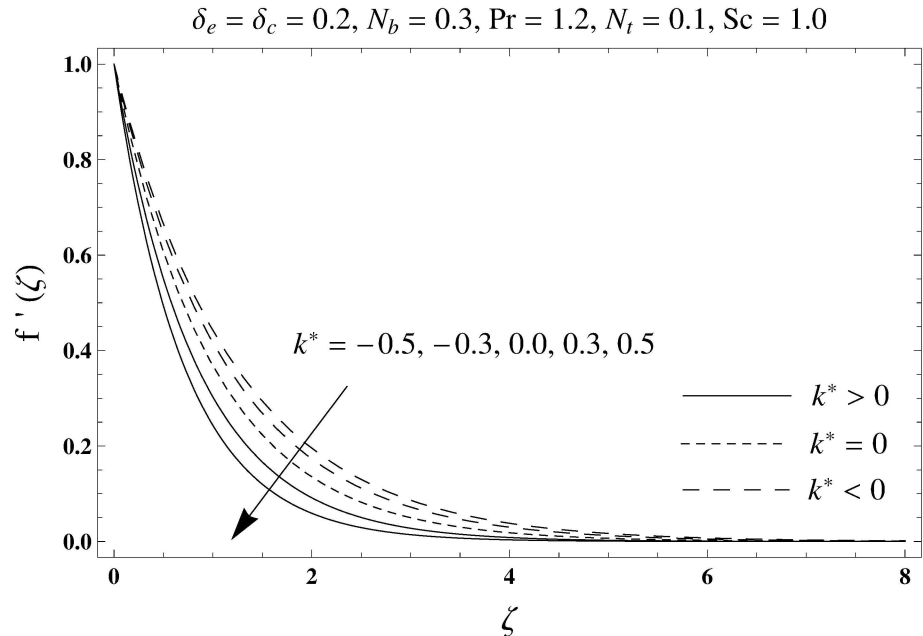

**Fig 3. Plots of velocity profile  $f'(\zeta)$  for viscoelastic parameter  $k^*$ .**

doi:10.1371/journal.pone.0168824.g003

parameter ( $k^* < 0$ ) when compared with elastico-viscous parameter ( $k^* > 0$ ). Here ( $\delta_e = 0$ ) represents that the present model is reduced to classical Fourier's law. Fig 6 demonstrates that how the temperature field is get effected by Prandtl number (Pr) for both fluid cases. It is observed that by enhancing Prandtl number (Pr), the temperature  $\theta(\zeta)$  and thermal layer thickness decreases. Physically Prandtl number depends upon the thermal diffusivity. Larger

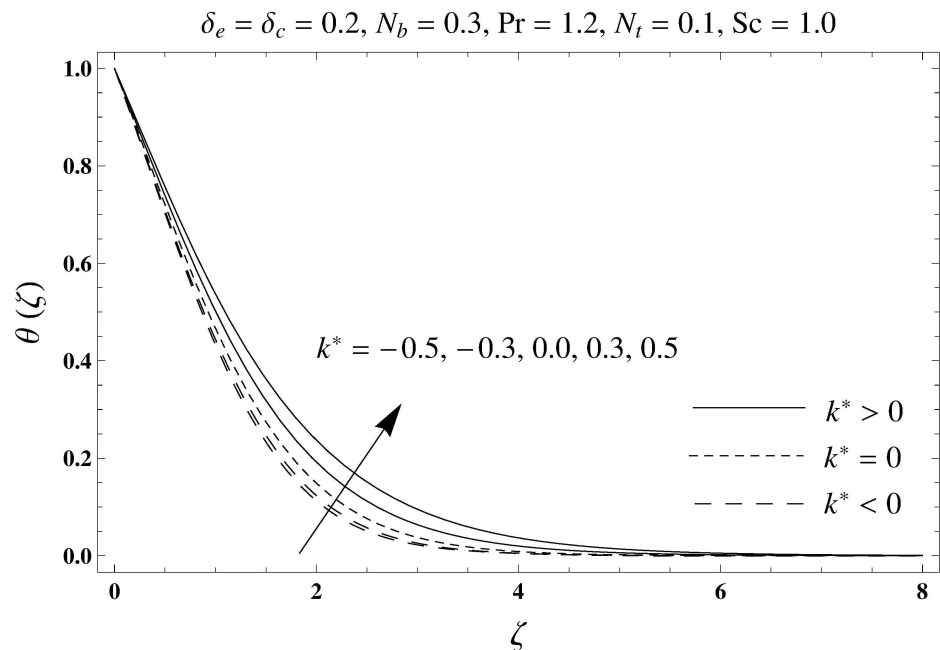

**Fig 4. Plots of temperature profile  $\theta(\zeta)$  for viscoelastic parameter  $k^*$ .**

doi:10.1371/journal.pone.0168824.g004

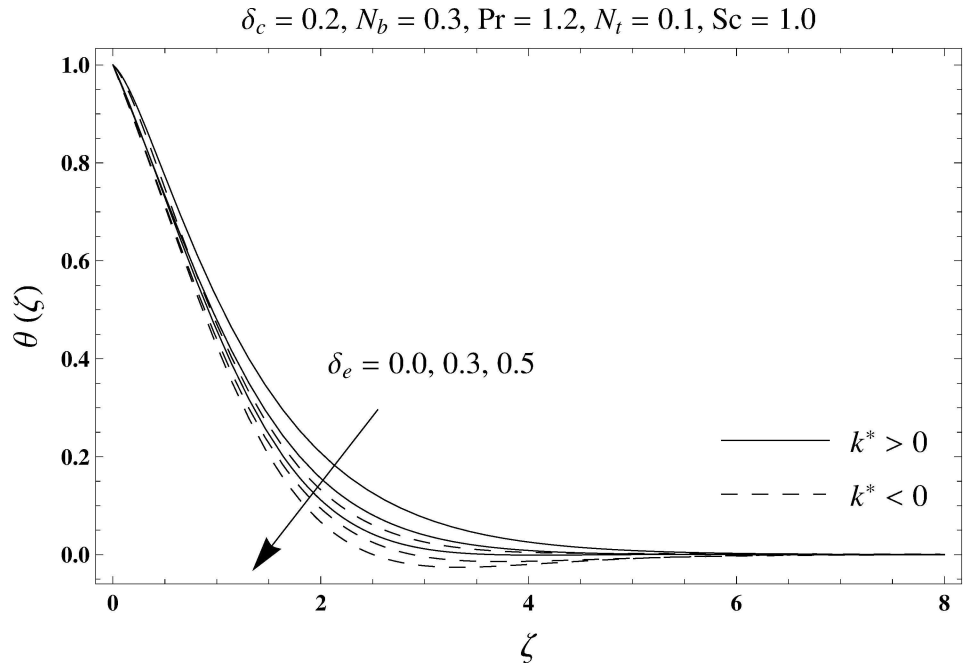

**Fig 5.** Plots of temperature profile  $\theta(\zeta)$  for thermal relaxation parameter  $\delta_e$ .

doi:10.1371/journal.pone.0168824.g005

values of Prandtl number correspond to a weaker thermal diffusivity. Such weaker thermal diffusivity creates a reduction in the temperature profile and related thickness of the thermal boundary layer. Moreover the thermal boundary layer thickness is less for second grade parameter ( $k^* < 0$ ) in comparison to the elasto-viscous parameter ( $k^* > 0$ ). Fig 7 shows the variation in temperature profile  $\theta(\zeta)$  for different values of Brownian motion parameter ( $N_b$ )

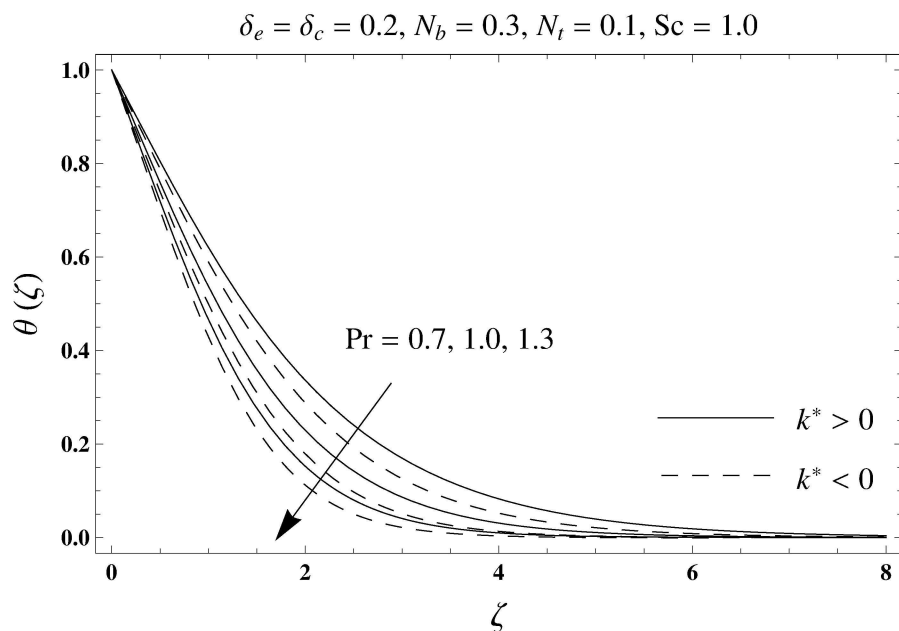

**Fig 6.** Plots of temperature profile  $\theta(\zeta)$  for Prandtl number  $Pr$ .

doi:10.1371/journal.pone.0168824.g006

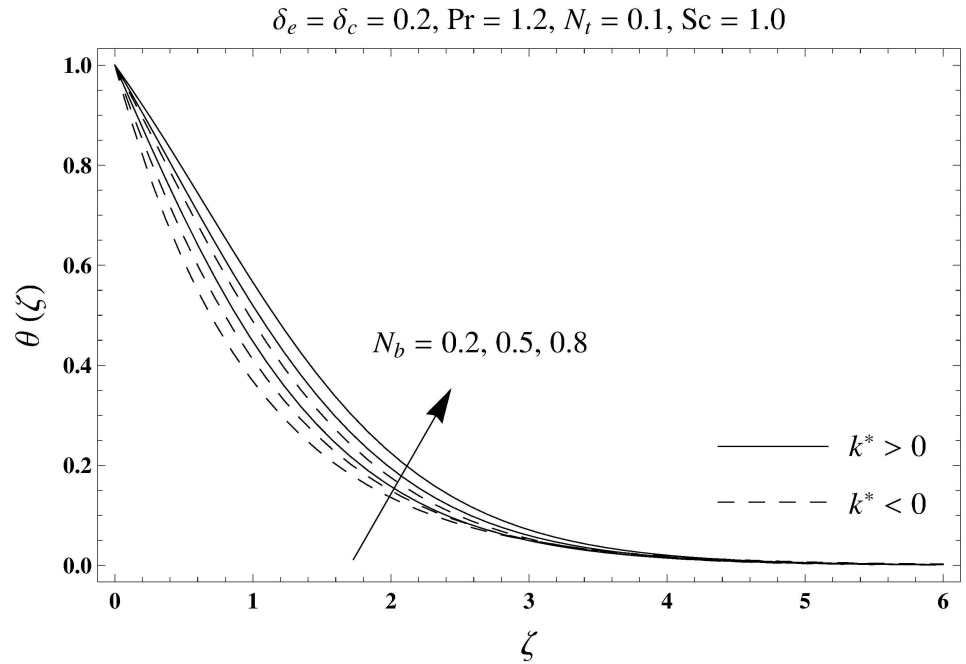

**Fig 7. Plots of temperature profile  $\theta(\zeta)$  for Brownian motion parameter  $N_b$ .**

doi:10.1371/journal.pone.0168824.g007

for both fluids. From this Fig it has been noted that by increasing Brownian motion parameter ( $N_b$ ), an enhancement appeared in temperature  $\theta(\zeta)$  and its related thickness of thermal layer for both fluids. Moreover the thermal layer thickness is lower for negative values of ( $k^*$ ) when compared with positive values of ( $k^*$ ). Fig 8 is drawn to depict the influence of thermophoresis

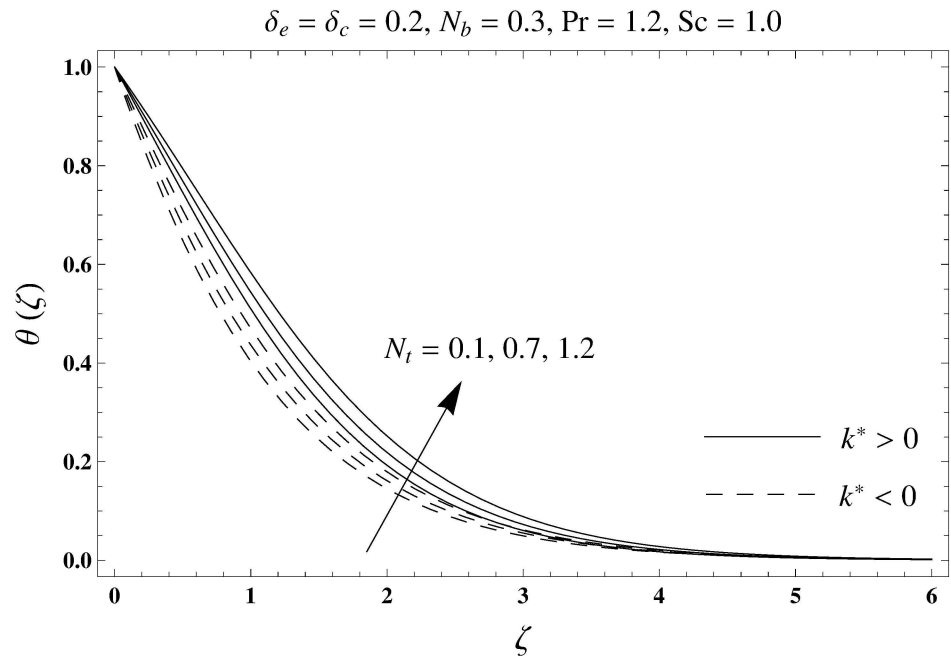

**Fig 8. Plots of temperature profile  $\theta(\zeta)$  for thermophoresis parameter  $N_t$ .**

doi:10.1371/journal.pone.0168824.g008

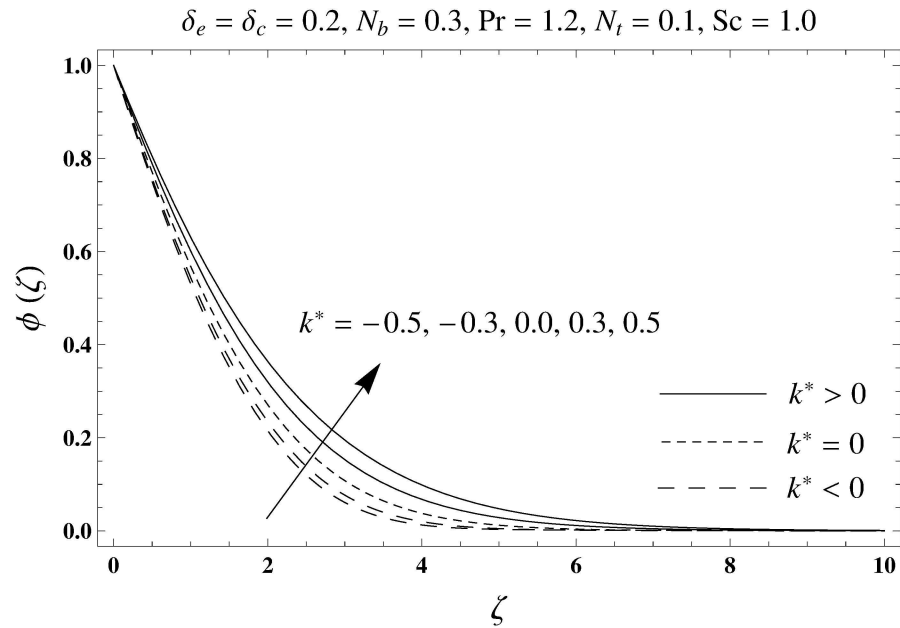

**Fig 9. Plots of concentration profile  $\phi(\zeta)$  for viscoelastic parameter  $k^*$ .**

doi:10.1371/journal.pone.0168824.g009

parameter ( $N_t$ ) on temperature field  $\theta(\zeta)$  for both fluids. Larger values of thermophoresis parameter ( $N_t$ ) constitute a higher temperature field and more thermal layer thickness. The reason behind this phenomenon is that an enhancement in thermophoresis parameter ( $N_t$ ) yields a stronger thermophoretic force which allows deeper migration of nanoparticles in the fluid which is far away from the surface forms a higher temperature field and more thickness of thermal layer for both fluids. Moreover thermal layer thickness is lower for second grade parameter ( $k^* < 0$ ) in comparison to the elastico-viscous parameter ( $k^* > 0$ ). Fig 9 is sketched to examine that how concentration field  $\phi(\zeta)$  get effected by viscoelastic parameter ( $k^*$ ). From this Fig the concentration field  $\phi(\zeta)$  is stronger for elastico-viscous parameter ( $k^* > 0$ ) and weaker for second grade parameter ( $k^* < 0$ ). Fig 10 shows how the concentration relaxation parameter ( $\delta_c$ ) effects concentration field  $\phi(\zeta)$  for both fluids. By increasing concentration relaxation parameter ( $\delta_c$ ), both the concentration  $\phi(\zeta)$  and thickness of concentration layer decrease. It is also noticed that concentration layer thickness is lower for second grade parameter ( $k^* < 0$ ) when compared with the elastico-viscous parameter ( $k^* > 0$ ). From Fig 11 we observed that the larger Schmidt number forms a decay in the concentration field  $\phi(\zeta)$  and its related thickness of concentration layer for both fluids. Physically Schmidt number is based on Brownian diffusivity. An increase in Schmidt number ( $Sc$ ) yields a weaker Brownian diffusivity. Such weaker Brownian diffusivity corresponds to lower concentration field  $\phi(\zeta)$  for both fluids. It is also observed that concentration field  $\phi(\zeta)$  is lower for negative values of ( $k^*$ ) when compared with the positive values of ( $k^*$ ). From Fig 12 it is clearly examined that a weaker concentration field  $\phi(\zeta)$  is generated by using larger Brownian motion parameter ( $N_b$ ) for both fluids. In nanofluid flow, due to the existence of nanoparticles, the Brownian motion takes place and with the increase in Brownian motion parameter ( $N_b$ ) the Brownian motion is affected and hence the concentration layer thickness reduces. It is also examined that concentration field is less for ( $k^* < 0$ ) in comparison to ( $k^* > 0$ ). Fig 13 shows that the higher thermophoresis parameter ( $N_t$ ) yields a stronger concentration field  $\phi(\zeta)$  for both fluid cases. Moreover the concentration field  $\phi(\zeta)$  is weaker for ( $k^* < 0$ ) when compared with ( $k^* > 0$ ). Table 3 shows

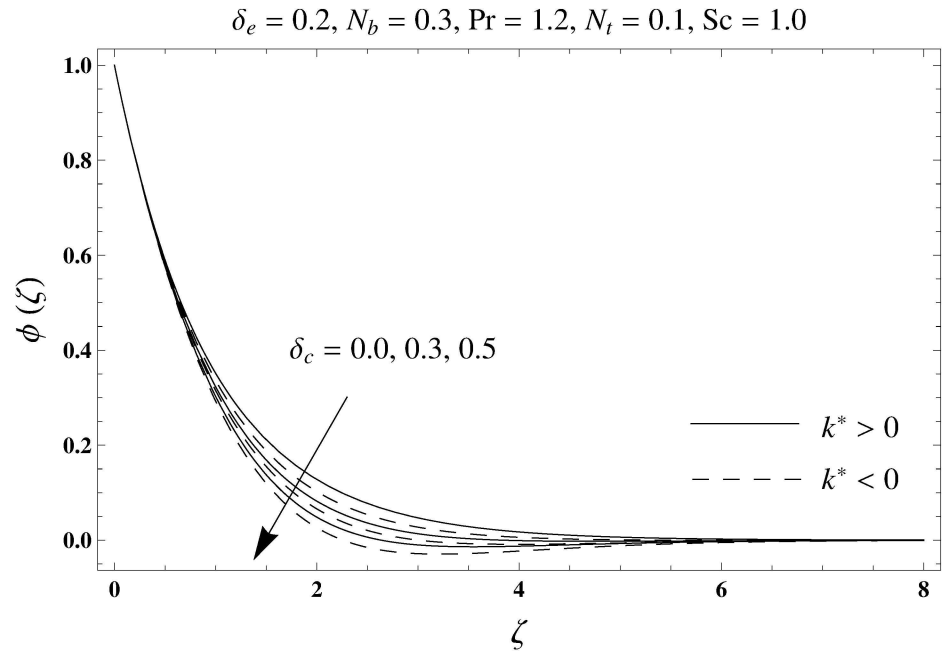

**Fig 10. Plots of concentration profile  $\phi(\zeta)$  for concentration relaxation parameter  $\delta_c$ .**

doi:10.1371/journal.pone.0168824.g010

the comparison for different values of viscoelastic parameter  $k^*$  with optimal homotopy analysis method (OHAM). Table 3 presents a good agreement of HAM solution with the existing optimal homotopy analysis method (OHAM) solution in a limiting sense. Table 4 is calculated in order to investigate the numerical computations of skin friction coefficient  $-\text{Re}_x^{1/2} C_f$  for several values of ( $k^*$ ). Here we noticed that the skin friction coefficient is higher in case of

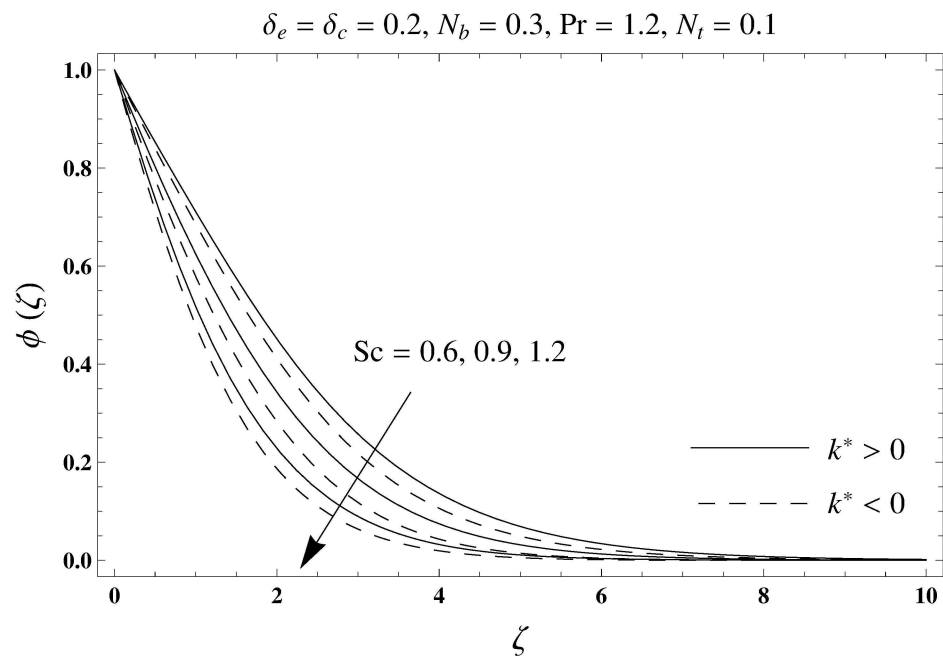

**Fig 11. Plots of concentration profile  $\phi(\zeta)$  for Schmidt number  $Sc$ .**

doi:10.1371/journal.pone.0168824.g011

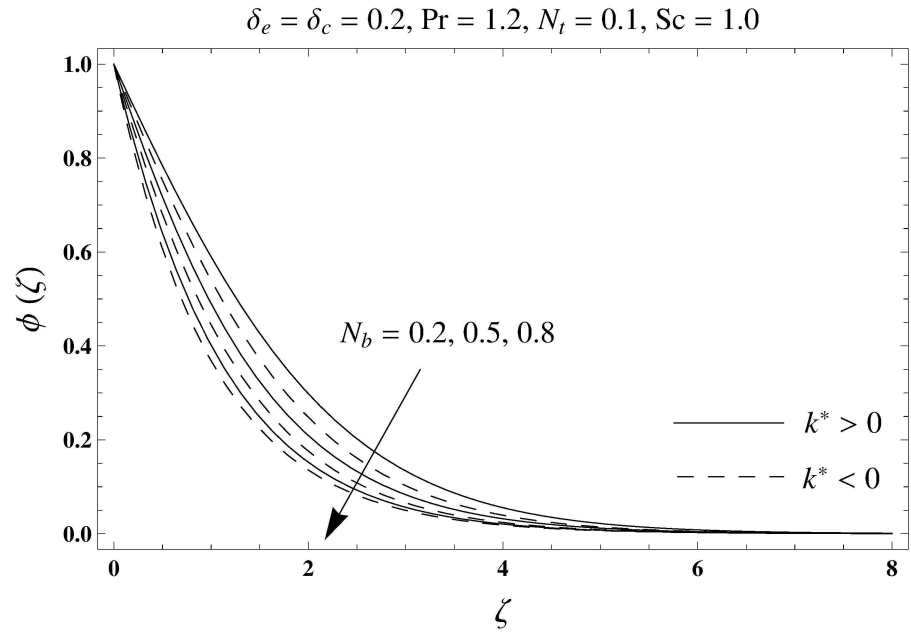

**Fig 12. Plots of concentration profile  $\phi(\zeta)$  for Brownian motion parameter  $N_b$ .**

doi:10.1371/journal.pone.0168824.g012

second grade material ( $k^* < 0$ ) while opposite trend is noticed for elastico-viscous material ( $k^* > 0$ ). Tables 5 and 6 show the numerical computations of heat transfer rate  $-\theta'(0)$  for various values of thermal relaxation parameter ( $\delta_e$ ) in case of elastico-viscous ( $k^* > 0$ ) and second grade ( $k^* < 0$ ) materials respectively. Here we noticed that the heat transfer rate  $-\theta'(0)$  has higher values for larger ( $\delta_e$ ) in both materials. It is also observed that the values of heat transfer rate  $-\theta'(0)$  for negative values of ( $k^*$ ) are higher when compared with the positive values of ( $k^*$ ).

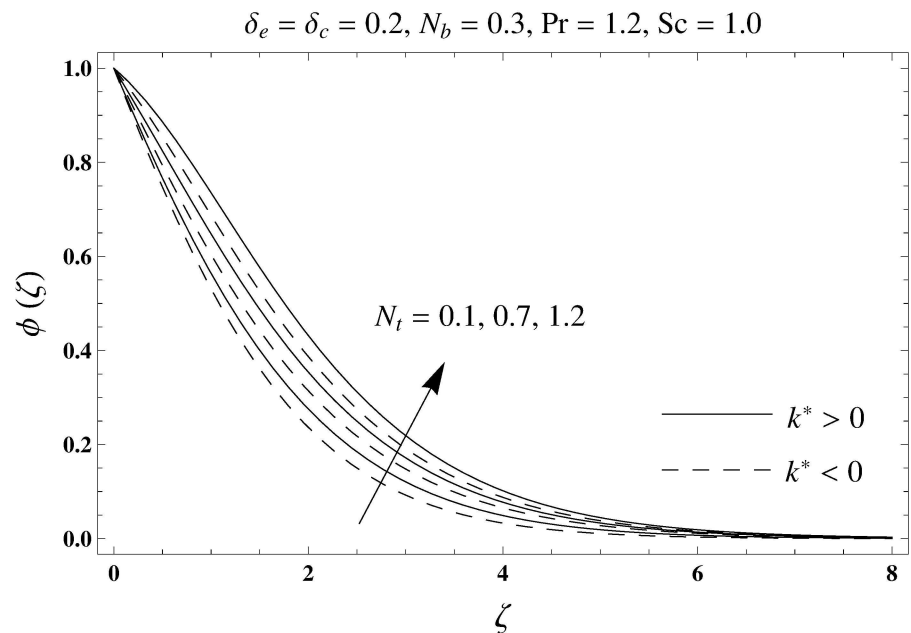

**Fig 13. Plots of concentration profile  $\phi(\zeta)$  for thermophoresis parameter  $N_t$ .**

doi:10.1371/journal.pone.0168824.g013

**Table 3. Comparative values of  $-Re_x^{1/2}C_f$  for different values of viscoelastic parameter  $k^*$ .**

| $k^*$ | $-Re_x^{1/2}C_f$ |           |
|-------|------------------|-----------|
|       | HAM              | OHAM [35] |
| 0     | 1.00000          | 1.00000   |
| -0.25 | 1.56525          | 1.56525   |
| -0.5  | 2.04124          | 2.04124   |

doi:10.1371/journal.pone.0168824.t003

**Table 4. Numerical data for skin friction coefficient  $-Re_x^{1/2}C_f$  for various values of  $k^*$ .**

| $k^*$            | -0.3    | -0.2    | -0.1    | 0.0     | 0.1     | 0.2     | 0.3     |
|------------------|---------|---------|---------|---------|---------|---------|---------|
| $-Re_x^{1/2}C_f$ | 1.66641 | 1.46059 | 1.23950 | 1.00000 | 0.73786 | 0.44721 | 0.11952 |

doi:10.1371/journal.pone.0168824.t004

**Table 5. Numerical values of heat transfer rate  $-\theta'(0)$  in case of elasto-viscous material for different values of  $\delta_e$  when  $k^* = 0.2$ ,  $\delta_c = 0.2$ ,  $N_b = 0.3$ ,  $Pr = 1.2$ ,  $N_t = 0.1$  and  $Sc = 1.0$ .**

| $\delta_e$    | 0.0     | 0.1     | 0.2     | 0.3     |
|---------------|---------|---------|---------|---------|
| $-\theta'(0)$ | 0.51271 | 0.51943 | 0.52643 | 0.53375 |

doi:10.1371/journal.pone.0168824.t005

**Table 6. Numerical values of heat transfer rate  $-\theta'(0)$  in case of second grade material for different values of  $\delta_e$  when  $k^* = -0.2$ ,  $\delta_c = 0.2$ ,  $N_b = 0.3$ ,  $Pr = 1.2$ ,  $N_t = 0.1$  and  $Sc = 1.0$ .**

| $\delta_e$    | 0.0     | 0.1     | 0.2     | 0.3     |
|---------------|---------|---------|---------|---------|
| $-\theta'(0)$ | 0.54601 | 0.55413 | 0.56243 | 0.57116 |

doi:10.1371/journal.pone.0168824.t006

**Table 7. Numerical values of mass transfer rate  $-\phi'(0)$  in case of elasto-viscous material for different values of  $\delta_c$  when  $k^* = 0.2$ ,  $\delta_e = 0.2$ ,  $N_b = 0.3$ ,  $Pr = 1.2$ ,  $N_t = 0.1$  and  $Sc = 1.0$ .**

| $\delta_c$  | 0.0     | 0.1     | 0.2     | 0.3     |
|-------------|---------|---------|---------|---------|
| $-\phi'(0)$ | 0.43849 | 0.44576 | 0.45332 | 0.46120 |

doi:10.1371/journal.pone.0168824.t007

**Table 8. Numerical values of mass transfer rate  $-\phi'(0)$  in case of second grade material for different values of  $\delta_c$  when  $k^* = -0.2$ ,  $\delta_e = 0.2$ ,  $N_b = 0.3$ ,  $Pr = 1.2$ ,  $N_t = 0.1$  and  $Sc = 1.0$ .**

| $\delta_c$  | 0.0     | 0.1     | 0.2     | 0.3     |
|-------------|---------|---------|---------|---------|
| $-\phi'(0)$ | 0.48130 | 0.49059 | 0.50005 | 0.51006 |

doi:10.1371/journal.pone.0168824.t008

Tables 7 and 8 represent the numerical values of mass transfer rate  $-\phi'(0)$  for various values of concentration relaxation parameter ( $\delta_c$ ) in cases of positive and negative values of ( $k^*$ ). From these Tables we concluded that the values of mass transfer rate  $-\phi'(0)$  for ( $k^* < 0$ ) are higher when compared with ( $k^* > 0$ ).



## 6. Conclusions

Boundary-layer flow of viscoelastic nanofluids bounded by a linear stretchable surface with Cattaneo-Christov double diffusion has been discussed. The key points of the presented study are given below:

- An enhancement in the positive values of viscoelastic parameter ( $k^*$ ) demonstrate a decreasing behavior for the velocity field  $f'(\zeta)$  while opposite behavior is noted for the negative values of viscoelastic parameter ( $k^*$ ).
- Larger values of Prandtl number (Pr) show decreasing trend for temperature profile  $\theta(\zeta)$  and its related thickness of thermal layer.
- Both temperature field  $\theta(\zeta)$  and its associated thermal layer thickness are reduced for larger thermal relaxation parameter ( $\delta_e$ ).
- Both temperature  $\theta(\zeta)$  and concentration  $\phi(\zeta)$  fields show opposite behavior for increasing values of Brownian motion parameter ( $N_b$ ).
- Higher concentration relaxation parameter ( $\delta_c$ ) causes a decay in the concentration field  $\phi(\zeta)$ .
- Larger thermophoresis parameter ( $N_t$ ) produces enhancement for temperature  $\theta(\zeta)$  and concentration  $\phi(\zeta)$  fields.
- For positive values of viscoelastic parameter ( $k^*$ ), skin friction coefficient decreases while opposite trend has been observed for the negative values of viscoelastic parameter ( $k^*$ ).
- For positive and negative values of viscoelastic parameter ( $k^*$ ), both heat and mass transfer rates are higher for larger thermal ( $\delta_e$ ) and concentration ( $\delta_c$ ) relaxation parameters.
- The present model corresponds to the classical Fourier's and Fick's laws when  $\delta_e = \delta_c = 0$ .

## Author Contributions

**Conceptualization:** TH A. Aziz TM A. Alsaedi.

**Data curation:** TH A. Aziz TM A. Alsaedi.

**Formal analysis:** TH A. Aziz TM A. Alsaedi.

**Investigation:** TH A. Aziz TM A. Alsaedi.

**Methodology:** TH A. Aziz TM A. Alsaedi.

**Project administration:** TH A. Aziz TM A. Alsaedi.

**Resources:** TH A. Aziz TM A. Alsaedi.

**Software:** TH A. Aziz TM A. Alsaedi.

**Supervision:** TH A. Aziz TM A. Alsaedi.

**Validation:** TH A. Aziz TM A. Alsaedi.

**Visualization:** TH A. Aziz TM A. Alsaedi.

**Writing – original draft:** TH A. Aziz TM A. Alsaedi.

**Writing – review & editing:** TH A. Aziz TM A. Alsaedi.

## References

1. Choi SUS, Eastman JA. Enhancing thermal conductivity of fluids with nanoparticles. ASME International Mechanical Engineering Congress & Exposition, American Society of Mechanical Engineers, San Francisco 1995.
2. Buongiorno J. Convective transport in nanofluids. *ASME J Heat Transfer*. 2006; 128: 240–250.
3. Makinde OD, Aziz A. Boundary layer flow of a nanofluid past a stretching sheet with a convective boundary condition. *Int J Thermal Sci*. 2011; 50: 1326–1332.
4. Sheikholeslami M, Bandpy MG, Ellahi R, Hassan M, Soleimani S. Effects of MHD on Cu-water nanofluid flow and heat transfer by means of CVFEM. *J Magn Magn Mater*. 2014; 349: 188–200.
5. Hayat T, Aziz A, Muhammad T, Ahmad B. Influence of magnetic field in three-dimensional flow of couple stress nanofluid over a nonlinearly stretching surface with convective condition. *Plos One*. 2015; 10: e0145332. doi: [10.1371/journal.pone.0145332](https://doi.org/10.1371/journal.pone.0145332) PMID: [26714259](https://pubmed.ncbi.nlm.nih.gov/26714259/)
6. Malvandi A, Safaei MR, Kaffash MH, Ganji DD. MHD mixed convection in a vertical annulus filled with  $Al_2O_3$ -water nanofluid considering nanoparticle migration. *J Magn Magn Mater*. 2015; 382: 296–306.
7. Hayat T, Muhammad T, Alsaedi A, Alhuthali MS. Magnetohydrodynamic three-dimensional flow of viscoelastic nanofluid in the presence of nonlinear thermal radiation. *J Magn Magn Mater*. 2015; 385: 222–229.
8. Chamkha A, Abbasbandy S, Rashad AM. Non-Darcy natural convection flow for non-Newtonian nanofluid over cone saturated in porous medium with uniform heat and volume fraction fluxes. *Int J Numer Methods Heat Fluid Flow*. 2015; 25: 422–437.
9. Gireesha BJ, Gorla RSR, Mahanthesh B. Effect of suspended nanoparticles on three-dimensional MHD flow, heat and mass transfer of radiating Eyring-Powell fluid over a stretching sheet. *J Nanofluids*. 2015; 4: 474–484.
10. Lin Y, Zheng L, Zhang X, Ma L, Chen G. MHD pseudo-plastic nanofluid unsteady flow and heat transfer in a finite thin film over stretching surface with internal heat generation. *Int J Heat Mass Transfer*. 2015; 84: 903–911.
11. Sheikholeslami M, Ellahi R. Three dimensional mesoscopic simulation of magnetic field effect on natural convection of nanofluid. *Int J Heat Mass Transfer*. 2015; 89: 799–808.
12. Hayat T, Muhammad T, Qayyum A, Alsaedi A, Mustafa M. On squeezing flow of nanofluid in the presence of magnetic field effects. *J Mol Liq*. 2016; 213: 179–185.
13. Hsiao KL. Stagnation electrical MHD nanofluid mixed convection with slip boundary on a stretching sheet. *Appl Thermal Eng*. 2016; 98: 850–861.
14. Ramzan M, Bilal M. Three-dimensional flow of an elastico-viscous nanofluid with chemical reaction and magnetic field effects. *J Mol Liq*. 2016; 215: 212–220.
15. Hayat T, Hussain Z, Alsaedi A, Ahmad B. Heterogeneous-homogeneous reactions and melting heat transfer effects in flow with carbon nanotubes. *J Mol Liq*. 2016; 220: 200–207.
16. Malvandi A, Ganji DD, Pop I. Laminar filmwise condensation of nanofluids over a vertical plate considering nanoparticles migration. *Appl Thermal Eng*. 2016; 100: 979–986.
17. Sui J, Zheng L, Zhang X. Boundary layer heat and mass transfer with Cattaneo-Christov double-diffusion in upper-convected Maxwell nanofluid past a stretching sheet with slip velocity. *Int J Thermal Sci*. 2016; 104: 461–468.
18. Hayat T, Aziz A, Muhammad T, Alsaedi A. On magnetohydrodynamic three-dimensional flow of nanofluid over a convectively heated nonlinear stretching surface. *Int J Heat Mass Transfer*. 2016; 100: 566–572.
19. Hayat T, Muhammad T, Shehzad SA, Alsaedi A. An analytical solution for magnetohydrodynamic Oldroyd-B nanofluid flow induced by a stretching sheet with heat generation/absorption. *Int J Thermal Sci*. 2017; 111: 274–288.
20. Hayat T, Muhammad T, Shehzad SA, Alsaedi A. On magnetohydrodynamic flow of nanofluid due to a rotating disk with slip effect: A numerical study. *Comput Methods Appl Mech Eng*. 2017; 315: 467–477.
21. Fourier JBJ. *Théorie Analytique De La Chaleur*. Paris 1822.
22. Cattaneo C. Sulla conduzione del calore. *Atti Semin Mat Fis Univ Modena Reggio Emilia*. 1948; 3: 83–101.
23. Christov CI. On frame indifferent formulation of the Maxwell-Cattaneo model of finite-speed heat conduction. *Mech Res Commun*. 2009; 36: 481–486.
24. Straughan B. Thermal convection with the Cattaneo-Christov model. *Int J Heat Mass Transfer*. 2010; 53: 95–98.

25. Ciarletta M, Straughan B. Uniqueness and structural stability for the Cattaneo-Christov equations. *Mech Res Commun*. 2010; 37: 445–447.
26. Haddad SAM. Thermal instability in Brinkman porous media with Cattaneo-Christov heat flux. *Int J Heat Mass Transfer*. 2014; 68: 659–668.
27. Han S, Zheng L, Li C, Zhang X. Coupled flow and heat transfer in viscoelastic fluid with Cattaneo-Christov heat flux model. *Appl Math Lett*. 2014; 38: 87–93.
28. Mustafa M. Cattaneo-Christov heat flux model for rotating flow and heat transfer of upper-convected Maxwell fluid. *AIP Adv*. 2015; 5: 047109.
29. Khan JA, Mustafa M, Hayat T, Alsaedi A. Numerical study of Cattaneo-Christov heat flux model for viscoelastic flow due to an exponentially stretching surface. *Plos One*. 2015; 10: e0137363. doi: [10.1371/journal.pone.0137363](https://doi.org/10.1371/journal.pone.0137363) PMID: [26325426](https://pubmed.ncbi.nlm.nih.gov/26325426/)
30. Hayat T, Muhammad T, Alsaedi A, Mustafa M. A comparative study for flow of viscoelastic fluids with Cattaneo-Christov heat flux. *Plos One*. 2016; 11: e0155185. doi: [10.1371/journal.pone.0155185](https://doi.org/10.1371/journal.pone.0155185) PMID: [27176779](https://pubmed.ncbi.nlm.nih.gov/27176779/)
31. Ariel PD. On the flow of an elastico-viscous fluid near a rotating disk. *J Comput Appl Math*. 2003; 154: 1–25.
32. Tan WC, Masuoka T. Stokes first problem for second grade fluid in a porous half space. *Int J Non-Linear Mech*. 2005; 40: 515–522.
33. Fetecau C, Fetecau C. Starting solutions for the motion of a second grade fluid due to longitudinal and torsional oscillations of a circular cylinder. *Int J Eng Sci*. 2006; 44: 788–796.
34. Turkyilmazoglu M. The analytical solution of mixed convection heat transfer and fluid flow of a MHD viscoelastic fluid over a permeable stretching surface. *Int J Mech Sci*. 2013; 77: 263–268.
35. Mustafa M. Viscoelastic flow and heat transfer over a non-linearly stretching sheet: OHAM solution. *J Appl Fluid Mech*. 2016; 9: 1321–1328.
36. Hayat T, Aziz A, Muhammad T, Ahmad B. On magnetohydrodynamic flow of second grade nanofluid over a nonlinear stretching sheet. *J Magn Magn Mater*. 2016; 408: 99–106.
37. Gao ZK, Fang PC, Ding MS, Jin ND. Multivariate weighted complex network analysis for characterizing nonlinear dynamic behavior in two-phase flow. *Exp Therm Fluid Sci*. 2015; 60: 157–164.
38. Gao ZK, Yang YX, Fang PC, Jin ND, Xia CY, Hu LD. Multi-frequency complex network from time series for uncovering oil-water flow structure. *Sci Rep*. 2015; 5: 8222. doi: [10.1038/srep08222](https://doi.org/10.1038/srep08222) PMID: [25649900](https://pubmed.ncbi.nlm.nih.gov/25649900/)
39. Gao ZK, Yang YX, Zhai LS, Ding MS, Jin ND. Characterizing slug to churn flow transition by using multivariate pseudo Wigner distribution and multivariate multiscale entropy. *Chem Eng J*. 2016; 291: 74–81.
40. Gao Z, Yang Y, Zhai L, Jin N, Chen G. A four-sector conductance method for measuring and characterizing low-velocity oil-water two-phase flows. *IEEE Trans Instrumentation Measurement*. 2016; 65: 1690–1697.
41. Gao ZK, Cai Q, Yang YX, Dang WD, Zhang SS. Multiscale limited penetrable horizontal visibility graph for analyzing nonlinear time series. *Sci Rep*. 2016; 6: 35622. doi: [10.1038/srep35622](https://doi.org/10.1038/srep35622) PMID: [27759088](https://pubmed.ncbi.nlm.nih.gov/27759088/)
42. Liao SJ. On the homotopy analysis method for nonlinear problems. *Appl Math Comput*. 2004; 147: 499–513.
43. Dehghan M, Manafian J, Saadatmandi A. Solving nonlinear fractional partial differential equations using the homotopy analysis method. *Numer Meth Partial Diff Eq*. 2010; 26: 448–479.
44. Malvandi A, Hedayati F, Domairry G. Stagnation point flow of a nanofluid toward an exponentially stretching sheet with nonuniform heat generation/absorption. *J Thermodynamics*. 2013; 2013: 764827.
45. Sui J, Zheng L, Zhang X, Chen G. Mixed convection heat transfer in power law fluids over a moving conveyor along an inclined plate. *Int J Heat Mass Transfer*. 2015; 85: 1023–1033.
46. Ellahi R, Hassan M, Zeeshan A. Shape effects of nanosize particles in Cu-H<sub>2</sub>O nanofluid on entropy generation. *Int J Heat Mass Transfer*. 2015; 81: 449–456.
47. Hayat T, Abbas T, Ayub M, Muhammad T, Alsaedi A. On squeezed flow of Jeffrey nanofluid between two parallel disks. *Appl Sci*. 2016; 6: 346.
48. Hayat T, Imtiaz M, Alsaedi A. Boundary layer flow of Oldroyd-B fluid by exponentially stretching sheet. *Appl Math Mech-Engl Ed*. 2016; 37: 573–582.
49. Hayat T, Waqas M, Shehzad SA, Alsaedi A. Mixed convection flow of viscoelastic nanofluid by a cylinder with variable thermal conductivity and heat source/sink. *Int J Numer Methods Heat Fluid Flow*. 2016; 26: 214–234.
50. Hayat T, Hussain Z, Muhammad T, Alsaedi A. Effects of homogeneous and heterogeneous reactions in flow of nanofluids over a nonlinear stretching surface with variable surface thickness. *J Mol Liq*. 2016; 221: 1121–1127.
